# Supplementary material
Source: PubMed Central journal article supplement (PMC10010379)
Supplement: NIHMS1870954-supplement-1870954_RS.pdf [file NIHMS1870954-supplement-1870954_RS.pdf]

## Reporting Summary

Nature Portfolio wishes to improve the reproducibility of the work that we publish. This form provides structure for consistency and transparency in reporting. For further information on Nature Portfolio policies, see our [Editorial Policies](#) and the [Editorial Policy Checklist](#).

### Statistics

For all statistical analyses, confirm that the following items are present in the figure legend, table legend, main text, or Methods section.

n/a Confirmed

- The exact sample size ( $n$ ) for each experimental group/condition, given as a discrete number and unit of measurement
- A statement on whether measurements were taken from distinct samples or whether the same sample was measured repeatedly
- The statistical test(s) used AND whether they are one- or two-sided  
*Only common tests should be described solely by name; describe more complex techniques in the Methods section.*
- A description of all covariates tested
- A description of any assumptions or corrections, such as tests of normality and adjustment for multiple comparisons
- A full description of the statistical parameters including central tendency (e.g. means) or other basic estimates (e.g. regression coefficient) AND variation (e.g. standard deviation) or associated estimates of uncertainty (e.g. confidence intervals)
- For null hypothesis testing, the test statistic (e.g.  $F$ ,  $t$ ,  $r$ ) with confidence intervals, effect sizes, degrees of freedom and  $P$  value noted  
*Give  $P$  values as exact values whenever suitable.*
- For Bayesian analysis, information on the choice of priors and Markov chain Monte Carlo settings
- For hierarchical and complex designs, identification of the appropriate level for tests and full reporting of outcomes
- Estimates of effect sizes (e.g. Cohen's  $d$ , Pearson's  $r$ ), indicating how they were calculated

*Our web collection on [statistics for biologists](#) contains articles on many of the points above.*

### Software and code

Policy information about [availability of computer code](#)

**Data collection** Two-photon images were collected using ScanImage (v5.4); EEG/EMG signals were collected using Biological Data Acquisition and Analysis System (BL-420, v2.1, Chengdu TME tech. Ltd.).

**Data analysis** Calcium analyses were performed using CalmAn in Python version (v1.9.12; Github.com); dendritic spine and confocal images were analyzed using NIH ImageJ software (FIJI 1.53s); statistical analyses were performed using GraphPad Prism software (v8.4).

For manuscripts utilizing custom algorithms or software that are central to the research but not yet described in published literature, software must be made available to editors and reviewers. We strongly encourage code deposition in a community repository (e.g. GitHub). See the Nature Portfolio [guidelines for submitting code & software](#) for further information.

### Data

Policy information about [availability of data](#)

All manuscripts must include a [data availability statement](#). This statement should provide the following information, where applicable:

- Accession codes, unique identifiers, or web links for publicly available datasets
- A description of any restrictions on data availability
- For clinical datasets or third party data, please ensure that the statement adheres to our [policy](#)

All data are available in the main text or the supplementary materials.

## Field-specific reporting

Please select the one below that is the best fit for your research. If you are not sure, read the appropriate sections before making your selection.

Life sciences       Behavioural & social sciences       Ecological, evolutionary & environmental sciences

For a reference copy of the document with all sections, see [nature.com/documents/nr-reporting-summary-flat.pdf](https://www.nature.com/documents/nr-reporting-summary-flat.pdf)

## Life sciences study design

All studies must disclose on these points even when the disclosure is negative.

|                 |                                                                                                                                                                                                                                                                                                                                                                                                                                          |
|-----------------|------------------------------------------------------------------------------------------------------------------------------------------------------------------------------------------------------------------------------------------------------------------------------------------------------------------------------------------------------------------------------------------------------------------------------------------|
| Sample size     | No statistical methods were used to pre-determine sample sizes, but sample sizes for this study are similar to those reported in previous publications (PMIDs: 28671692, 34292944, 35561213, 36103825)                                                                                                                                                                                                                                   |
| Data exclusions | Imaging with excessive movement were removed from data analyses.                                                                                                                                                                                                                                                                                                                                                                         |
| Replication     | For two-photon imaging, EEG/EMG recordings, behavior tests, and confocal imaging, almost all experiments were replicated in three or more animals from more than two litters (typically three). Results in Extended Data Fig. 7m, n were replicated in two animals from two litters. For histology experiments, results were replicated in more than three brain sections per mouse, and results from different animals were consistent. |
| Randomization   | Animals were randomly assigned to treatment groups.                                                                                                                                                                                                                                                                                                                                                                                      |
| Blinding        | The experimenters were blinded to treatment groups such as surgery (sham vs. SNI), virus injection (empty vs. functional), and pharmacology (e.g., lidocaine vs. saline). Calcium and acetylcholine imaging data analyses were conducted using an automated analysis pipeline, which avoids the potential bias of manual analyses.                                                                                                       |

## Reporting for specific materials, systems and methods

We require information from authors about some types of materials, experimental systems and methods used in many studies. Here, indicate whether each material, system or method listed is relevant to your study. If you are not sure if a list item applies to your research, read the appropriate section before selecting a response.

### Materials & experimental systems

| n/a                                 | Involved in the study                                           |
|-------------------------------------|-----------------------------------------------------------------|
| <input type="checkbox"/>            | <input checked="" type="checkbox"/> Antibodies                  |
| <input checked="" type="checkbox"/> | <input type="checkbox"/> Eukaryotic cell lines                  |
| <input checked="" type="checkbox"/> | <input type="checkbox"/> Palaeontology and archaeology          |
| <input type="checkbox"/>            | <input checked="" type="checkbox"/> Animals and other organisms |
| <input checked="" type="checkbox"/> | <input type="checkbox"/> Human research participants            |
| <input checked="" type="checkbox"/> | <input type="checkbox"/> Clinical data                          |
| <input checked="" type="checkbox"/> | <input type="checkbox"/> Dual use research of concern           |

### Methods

| n/a                                 | Involved in the study                           |
|-------------------------------------|-------------------------------------------------|
| <input checked="" type="checkbox"/> | <input type="checkbox"/> ChIP-seq               |
| <input checked="" type="checkbox"/> | <input type="checkbox"/> Flow cytometry         |
| <input checked="" type="checkbox"/> | <input type="checkbox"/> MRI-based neuroimaging |

## Antibodies

|                 |                                                                                                                                                                                                                                                                                                                                                                                                                                                                                                                                                                                                                                                                                                                                                                                                                                                                                                                                                                                                                                                                                                                                                                                      |
|-----------------|--------------------------------------------------------------------------------------------------------------------------------------------------------------------------------------------------------------------------------------------------------------------------------------------------------------------------------------------------------------------------------------------------------------------------------------------------------------------------------------------------------------------------------------------------------------------------------------------------------------------------------------------------------------------------------------------------------------------------------------------------------------------------------------------------------------------------------------------------------------------------------------------------------------------------------------------------------------------------------------------------------------------------------------------------------------------------------------------------------------------------------------------------------------------------------------|
| Antibodies used | <p>Primary antibodies: mouse monoclonal anti-NeuN (clone A60) (1:500; MAB377; Millipore), rabbit polyclonal anti-GFP (1:1,500; ab6556; Abcam), mouse monoclonal anti-mCherry (clone GT844) (1:500; SAB2702295; SigmaAldrich), mouse monoclonal anti-CGRP (clone 4901) (1:400; C7113; SigmaAldrich), goat polyclonal anti-ChAT (1:400; AB144P; Millipore), mouse monoclonal anti-ChAT (clone CL3169) (1:200; MA5-31382; Invitrogen), rabbit polyclonal anti-VACht (1:300; 139103; Synaptic Systems), mouse monoclonal anti-VGAT (clone 117G4) (1:300; 131011; Synaptic Systems).</p> <p>Secondary antibodies: donkey anti-rabbit Alexa Fluor 488 (1:500; A21206; Invitrogen), donkey anti-rabbit CF488A (1:500; 20015; Biotium), donkey anti-rabbit CF543 (1:500; 20308; Biotium), donkey anti-rabbit Alexa Fluor 647 (1:500; A31573; Invitrogen), donkey anti-mouse Alexa Fluor 488 (1:500; A21202; Invitrogen), donkey anti-mouse CF543 (1:500; 20305; Biotium), donkey anti-mouse CF647 (1:500; 20046; Biotium), donkey anti-goat Alexa Fluor 488 (1:500; A11055; Invitrogen), donkey anti-goat CF543 (1:500; 20314; Biotium), donkey anti-goat CF647 (1:500; 20048; Biotium).</p> |
| Validation      | <p>Mouse monoclonal anti-NeuN (clone A60) (MAB377; Millipore): <a href="https://www.emdmillipore.com/US/en/product/Anti-NeuN-Antibody-clone-A60,MM_NF-MAB377">https://www.emdmillipore.com/US/en/product/Anti-NeuN-Antibody-clone-A60,MM_NF-MAB377</a></p> <p>Rabbit polyclonal anti-GFP (ab6556; Abcam): <a href="https://www.abcam.com/gfp-antibody-ab6556.html">https://www.abcam.com/gfp-antibody-ab6556.html</a></p> <p>Mouse monoclonal anti-mCherry (clone GT844) (SAB2702295; SigmaAldrich): <a href="https://www.sigmaaldrich.com/US/en/product/sigma/sab2702295">https://www.sigmaaldrich.com/US/en/product/sigma/sab2702295</a></p> <p>Mouse monoclonal anti-CGRP (clone 4901): <a href="https://www.sigmaaldrich.com/US/en/product/sigma/c7113">https://www.sigmaaldrich.com/US/en/product/sigma/c7113</a></p> <p>Goat polyclonal anti-ChAT: <a href="https://elifesciences.org/articles/8352">https://elifesciences.org/articles/8352</a></p>                                                                                                                                                                                                                           |

mouse monoclonal anti-ChAT (clone CL3169): Pang Y et al., Front Cell Dev Biol. (2022) 10: 849854.  
Rabbit polyclonal anti-VACHT: <https://sysy.com/product/139103>  
Mouse monoclonal anti-VGAT (clone 117G4): <https://sysy.com/product/131011>

## Animals and other organisms

Policy information about [studies involving animals](#); [ARRIVE guidelines](#) recommended for reporting animal research

### Laboratory animals

Thy1-YFP-H mice (Jackson Laboratory; Stock No: 003782), C57BL/6J (Stock No: 000664), ViplRES-Cre (Stock No: 010908), ViplRES-FLPo (Stock No: 028578), SstIRES-Cre (Stock No: 013044), PvalbT2A-Cre (Stock No: 012358), PvalbT2A-FLPo (Stock No: 022730), ChATIRES-Cre (Stock No: 006410), Slc17a6IRES-Cre mice (Stock No: 016963), and Rosa26-LSL-Cas9-EGFP mice (Stock No: 026175). Thy1-GCaMP6slow founder line 3 were obtained from Dr. Wenbiao Gan's laboratory at New York University. Mice were group-housed in temperature- and humidity-controlled rooms on a 12-h light-dark cycle (light: ZT0–12; dark: ZT12–24). Two- to 3-month-old animals of both sexes were used for all the experiments.

### Wild animals

No wild animals were used in this study.

### Field-collected samples

No field collected samples were used in this study.

### Ethics oversight

All animal experiments were carried out according to the protocols approved by the Columbia University Institutional Animal Care and Use Committee as consistent with the National Institutes of Health (NIH) Guidelines for the Care and Use of Laboratory Animals.

Note that full information on the approval of the study protocol must also be provided in the manuscript.
