# Supplementary material
Source: PubMed Central journal article supplement (PMC10010379)
Supplement: NIHMS1870954-supplement-1870954_Sup_Info.pdf [file NIHMS1870954-supplement-1870954_Sup_Info.pdf]

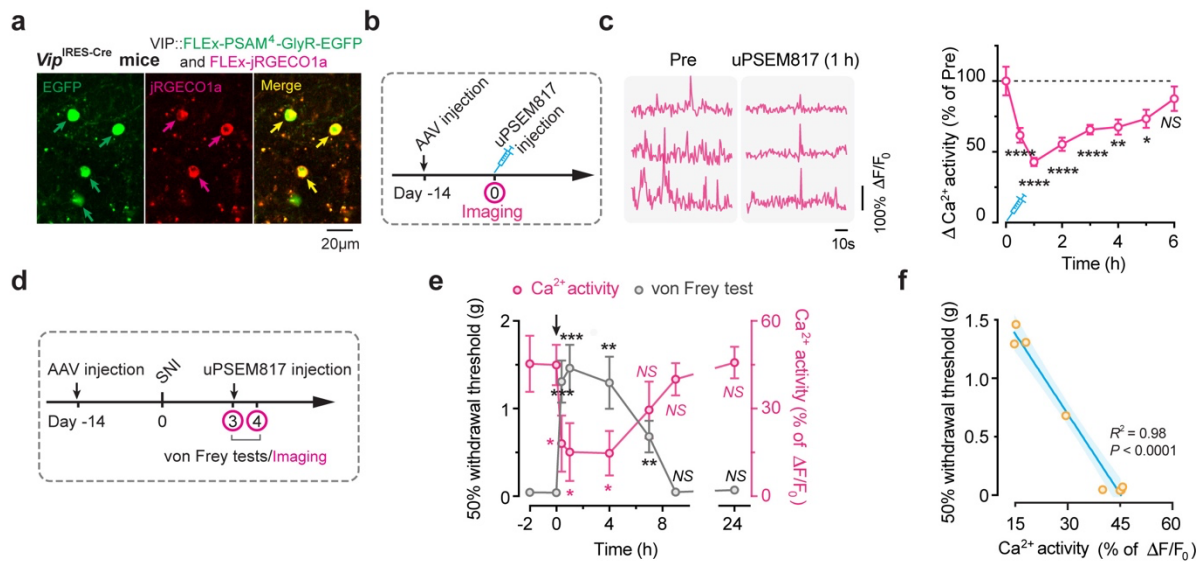

### Supplementary Fig. 1 | Intrapertoneal injection of uPSEM817 transiently suppresses VIP neuron activity.

**a**, Co-expression of inhibitory chemogenetic module PSAM<sup>4</sup>-GlyR and genetically encoded Ca<sup>2+</sup> indicator jRGECO1a in VIP INs through cortical injection of AAV viruses into the S1 of *Vip*<sup>IRES-Cre</sup> mice. Green, magenta, and yellow arrows indicate VIP INs expressing PSAM<sup>4</sup>-GlyR-EGFP, jRGECO1a, and both, respectively. **b**, Timeline (for **c**) to examine the acute effects of PSAM<sup>4</sup>-GlyR activation on VIP IN activity. **c**, Left, representative Ca<sup>2+</sup> traces of VIP INs expressing PSAM<sup>4</sup>-GlyR-EGFP and jRGECO1 before and 1 h after i.p. injection of uPSEM817 (ligand for PSAM<sup>4</sup>-GlyR). Right, the time course of Ca<sup>2+</sup> activity changes in VIP INs following uPSEM817 injection ( $n = 128$  cells from four mice). \*\*\*\* $P < 0.0001$ ,  $P = 0.0027$ ,  $0.031$ ,  $0.19$ . **d**, Timeline (for **e** and **f**) to examine the acute effects of PSAM<sup>4</sup>-GlyR activation on VIP IN activity in the S1 and mechanical paw withdrawal thresholds (von Frey test) in mice 3 days after SNI. **e**, Time course of mechanical thresholds and VIP IN Ca<sup>2+</sup> activity after a single dose of uPSEM817 ( $n = 106$  cells from five mice). von Frey,  $P = 0.0008$ ,  $0.0007$ ,  $0.0031$ ,  $0.0079$ ,  $0.86$ ,  $0.22$ ; Ca<sup>2+</sup> activity,  $P = 0.036$ ,  $0.024$ ,  $0.011$ ,  $0.35$ ,  $0.59$ ,  $0.95$ . **f**, Correlation between mechanical thresholds and VIP activity for all data points shown in (**e**) (blue line, linear regression; shading, 95% CI;  $R^2 = 0.98$ ,  $P < 0.0001$ ). Mean  $\pm$  SEM. \* $P < 0.05$ , \*\* $P < 0.01$ , \*\*\* $P < 0.001$ , \*\*\*\* $P < 0.0001$ ; NS, not significant; by two-sided Wilcoxon test for Ca<sup>2+</sup> activity (**c**, **e**) or paired *t*-test for von Frey (**e**).

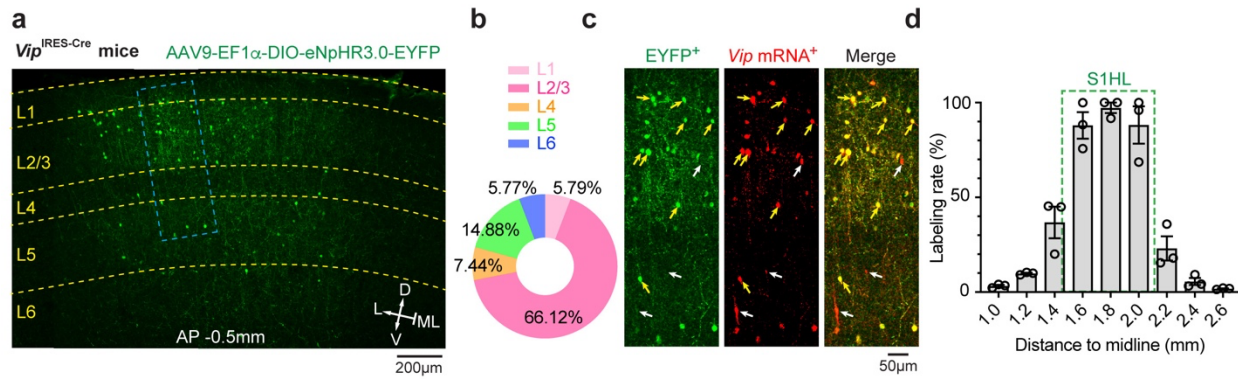

### Supplementary Fig. 2 | Validation of halorhodopsin expression in VIP INs in the S1.

**a**, Fluorescence image of the coronal section showing eNpHR3.0-EYFP expressed mainly in L2/3 of S1 (repeated in 3 mice). **b**, Percentages of EYFP-expressing VIP INs in different layers of S1. **c**, Colocalization of EYFP and *Vip* mRNA-reactive (using fluorescence *in situ* hybridization) somas in the boxed area of (**a**). Yellow and white arrows indicate VIP INs that are positive or negative for EYFP, respectively. **d**, Distribution of labeling rate (mean  $\pm$  SEM) as a function of distance to midline ( $n = 3$  mice). The labeling rate is defined as the ratio of EYFP<sup>+</sup>*Vip* mRNA<sup>+</sup> to *Vip* mRNA<sup>+</sup> cells. S1HL, S1 hindlimb region. L, lateral; ML, midline; D, dorsal; V, ventral.

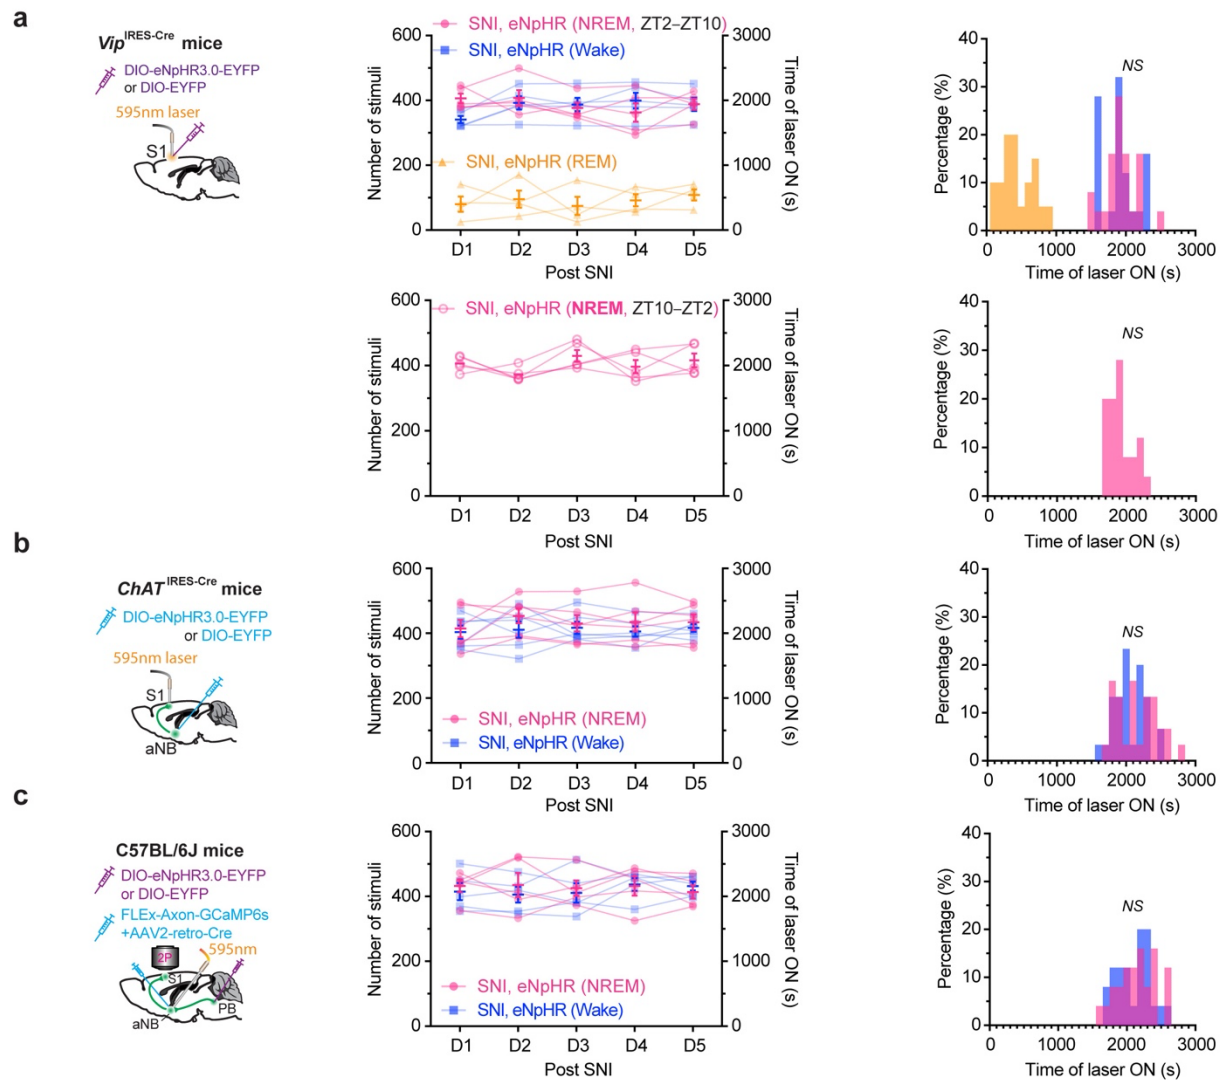

### Supplementary Fig. 3 | Laser light delivery data for optogenetic experiments.

**a**, Light delivery data for optogenetic experiments shown in **Fig. 2f** ( $n = 5, 5, 4, 5$  mice). Left, schematic of experimental design. A 595-nm laser light was delivered each day from ZT2 to ZT10 (see **Methods**), or from ZT10 to ZT2, for 5 consecutive days after SNI. Single stimulus duration, 5 s; frequency, 0.025 Hz for NREM or wake, 0.1 Hz for REM. Middle, number of stimuli (left y-axis) and the total time of laser ON per day (right y-axis) for individual mice from D1–D5 after SNI. Right, distribution of laser ON time for individual mice from D1–D5 for each group.  $P = 0.70$  (ZT2–ZT10; NREM vs. Wake).  $P = 0.47$  (NREM; ZT2–ZT10 vs. ZT10–ZT2). **b**, Light delivery data for experiments shown in **Fig. 5e** ( $n = 6$  mice per group;  $P = 0.39$ ). **c**, Light delivery data for experiments shown in **Fig. 6e** ( $n = 5$  mice per group;  $P = 0.91$ ). Mean  $\pm$  SEM. NS, not significant; by two-sided Kolmogorov-Smirnov test.

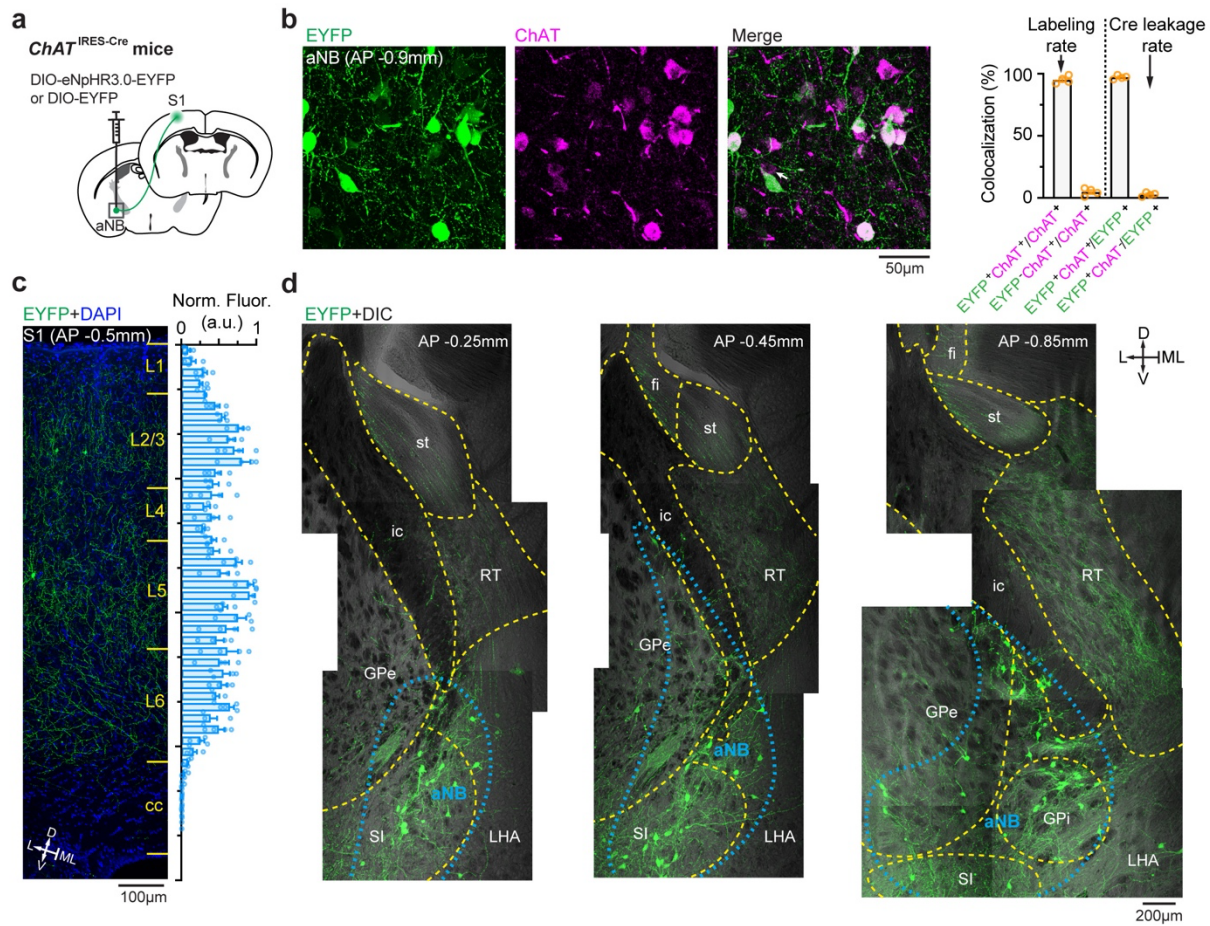

#### Supplementary Fig. 4 | Basal forebrain cholinergic neurons project to all layers of S1.

**a**, Schematic of experimental design. AAVs encoding Cre-inducible eNpHR3.0 or EYFP were injected into the aNB of *ChAT*<sup>IRES-Cre</sup> mice. **b**, Left, representative fluorescence images of aNB neurons showing the colocalization of EYFP and anti-ChAT immunoreactivity. Right, percentages of colocalized somas in aNB to estimate the cholinergic neuron labeling rate and Cre-leakage rate (mean  $\pm$  SEM;  $n = 4$  mice). **c**, Fluorescence image (left) and intensity distribution (right; mean  $\pm$  SEM) of EYFP<sup>+</sup> axons across all layers of S1 ipsilateral to the virus injection site ( $n = 4$  mice). a.u., arbitrary units. **d**, Representative fluorescence images at various AP coordinates showing EYFP<sup>+</sup> somas in the aNB region of the basal forebrain (the magnocellular region) (4 mice). Blue dashed lines profile the empirical region of NB (the field of magnocellular ChAT<sup>+</sup> neurons). L, lateral; ML, midline; D, dorsal; V, ventral; AP, anterior posterior; fi, fimbria; GPe, external globus pallidus; GPi, internal globus pallidus; ic, internal capsule; NB, nucleus basalis; RT, reticular nucleus of the thalamus; S1, primary somatosensory cortex; SI, substantia innominata; st, stria terminalis; LHA, lateral hypothalamic area.

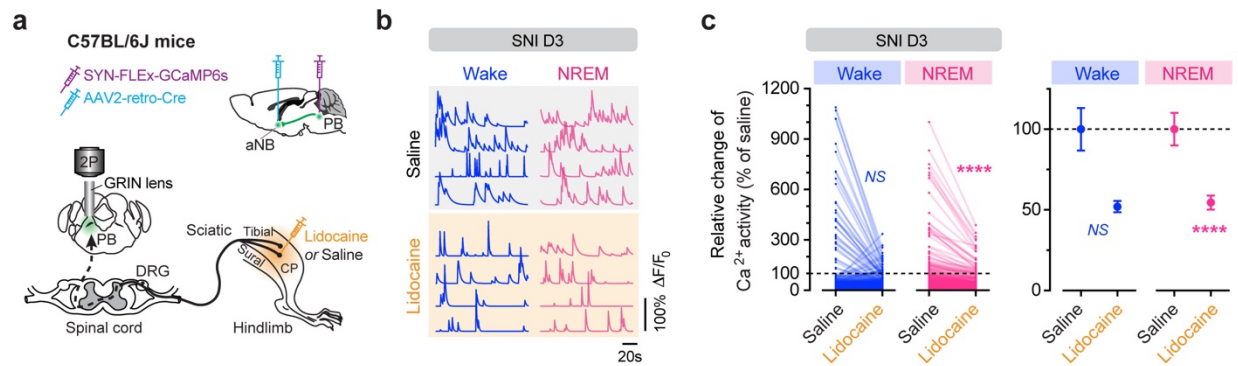

**Supplementary Fig. 5 | Local administration of lidocaine at the nerve injury site attenuates PB hyperactivity.**  
**a**, Experimental design. *In vivo*  $Ca^{2+}$  imaging was performed in the PB of C57BL/6J mice 3 days after SNI, 0.5 h after saline or lidocaine (a sodium channel blocker) administration at the nerve injury site. **b**, Representative  $Ca^{2+}$  traces of PB neurons during wake and NREM sleep after saline or lidocaine administration (3 mice). **c**, Normalized changes of  $Ca^{2+}$  activity in PB neurons during wake ( $P = 0.85$ ) and NREM sleep ( $P < 0.0001$ ) after applying saline or lidocaine to peripheral afferents ( $n = 222$  cells from three mice). Left, data from individual cells. Right, summary data (mean  $\pm$  SEM). *NS*, no significant; \*\*\*\* $P < 0.0001$ ; by Wilcoxon test.
